# Supplementary material for: Enhanced rate capabilities in a glass-ceramic-derived sodium all-solid-state battery
Source: PubMed Central journal article supplement (PMC7289851; doi:10.1038/s41598-020-66410-1), 2020-06-11
Supplement: 41598_2020_66410_MOESM2_ESM.pdf [file 41598_2020_66410_MOESM2_ESM.pdf]

## **Enhanced rate capabilities in a glass-ceramic-derived sodium all-solid-state battery**

Hideo Yamauchi<sup>1</sup>, Junichi Ikejiri<sup>1</sup>, Kei Tsunoda<sup>1</sup>, Ayumu Tanaka<sup>1</sup>, Fumio Sato<sup>1</sup>, Tsuyoshi Honma<sup>2\*</sup>, Takayuki Komatsu<sup>2</sup>

<sup>1</sup>Nippon Electric Glass Co., Ltd., Shiga 520-8639, Japan

<sup>2</sup>Department of Materials Science and Technology, Nagaoka University of Technology, Kamitomioka-cho 1603-1, Nagaoka, Niigata 940-2188, Japan

\*Correspondence: Tsuyoshi Honma

e-mail

honma@mst.nagaokaut.ac.jp

**Table S1.** Properties of all-solid-state batteries (ASSBs) examined in this study: specific surface areas of  $\text{Na}_2\text{FeP}_2\text{O}_7$  (NFP) and  $\beta''$ -alumina, average particle size, calcination temperature and time, composition of the cathode layer, weight of cathode materials, thickness of the cathode layer, and cell capacity.

and  $\beta''$ -alumina, average particle size, calcination temperature and time, composition of the cathode layer, weight of cathode materials, thickness of the cathode layer, and cell capacity.

| Cell                                | Powder                                                                      |                    | Calcination condition | Cathode            |                 |                        |                             | Cell capacity (as NFP:80mAh/g) ( $\text{mAh}/\text{cm}^2$ ) |                  |         |
|-------------------------------------|-----------------------------------------------------------------------------|--------------------|-----------------------|--------------------|-----------------|------------------------|-----------------------------|-------------------------------------------------------------|------------------|---------|
|                                     | BET-SSA ( $\text{m}^2/\text{g}$ ) (Average particle size ( $\mu\text{m}$ )) |                    |                       | Composition (wt%)  |                 | Cathode materials (mg) | Thickness ( $\mu\text{m}$ ) |                                                             | NFP loading (mg) |         |
|                                     | NFP                                                                         | $\beta''$ -Alumina |                       | $\beta''$ -Alumina | Acetylene black |                        |                             |                                                             |                  |         |
| A                                   | 10(0.8*)                                                                    | 5(2*)              | 550°C-1hour           | 72                 | 25              | 3                      | 5.41                        | 30                                                          | 3.9              | 0.31    |
| B                                   | 27(0.2**)                                                                   | 45(0.1**)          | 525°C-0.5hour         | 83                 | 13.5            | 3.5                    | 4.2                         | 25                                                          | 3.49             | 0.28    |
| C                                   | 27(0.2**)                                                                   | 45(0.1**)          | 525°C-0.5hour         | 83.4               | 12.4            | 4.2                    | 3.79                        | 22                                                          | 3.16             | 0.25    |
| D                                   | 27(0.2**)                                                                   | 45(0.1**)          | 525°C-0.5hour         | 83.4               | 12.4            | 4.2                    | 5.41                        | 40                                                          | 4.51             | 0.36    |
| E                                   | 27(0.2**)                                                                   | 45(0.1**)          | 525°C-0.5hour         | 83.4               | 12.4            | 4.2                    | 4.41                        | 30                                                          | 3.68             | 0.36*** |
| Ref. 1M NaPF <sub>6</sub> in EC/DEC | N/A(1.7*)                                                                   | —                  | —                     | 90                 | 5(PVDF)         | 5                      | 6.88                        | 40                                                          | 6.19             | 0.6     |

\*Laser diffraction particle size diffraction analysis, \*\* Analysis of SEM images, \*\*\* Cell capacity as 97mAh/g of NFP

**Table S2.** Analysis of the Nyquist plot of Cell A.

| Battery components        | Materials             | Composites                                         | Symmetric cells         | All-solid-state Na ion battery |        |
|---------------------------|-----------------------|----------------------------------------------------|-------------------------|--------------------------------|--------|
| Cathode (t=35μm)          | $R_{total}$           | $R_{total}$<br>$R_{NIFP}$<br>$R_{NIFP-SE\ powder}$ | $R_{cathode}$<br>27000Ω |                                |        |
|                           | $R_{bulk}$            |                                                    |                         |                                | 31000Ω |
|                           | $R_{grain\ boundary}$ |                                                    |                         |                                | 9000Ω  |
| Interface                 | $R$                   | 0.1Ω                                               | 2350Ω                   | 2571Ω                          |        |
|                           | $R_{total}$           | 0.14Ω                                              | 73Ω                     | 72Ω                            |        |
|                           | $R_{bulk}$            | 0.05Ω                                              | 25Ω                     | 27Ω                            |        |
| Solid electrolyte (t=1mm) | $R_{grain\ boundary}$ | 0.09Ω                                              | 48Ω                     | 45Ω                            |        |
|                           | $R_{total}$           | 72Ω                                                | $R_{interface}$<br>125Ω | $R_{interface}$<br>125Ω        |        |
|                           | $R_{bulk}$            | 27Ω                                                |                         |                                | 72Ω    |
| $R_{grain\ boundary}$     | 45Ω                   | 27Ω                                                |                         |                                |        |
| Anode (t=35μm)            | $R$                   | 1.0Ω                                               | 20Ω                     | 65Ω                            |        |

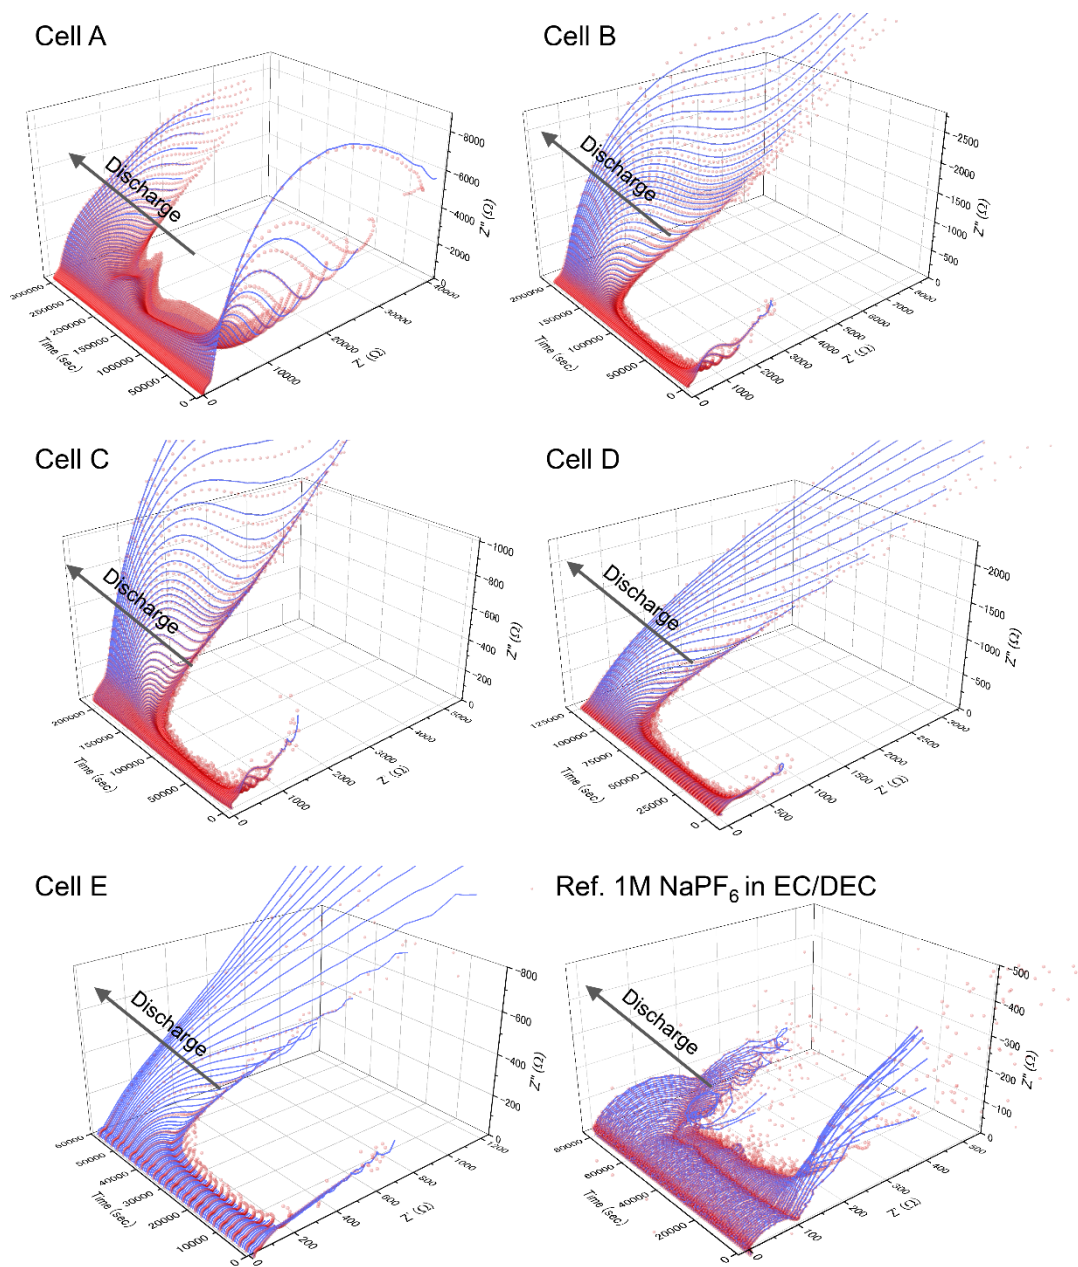

**Figure S1.** Three-dimensional (3D) impedance spectra of Cells A–E and 1 M NaPF<sub>6</sub> in EC/DEC acquired during the discharge process.

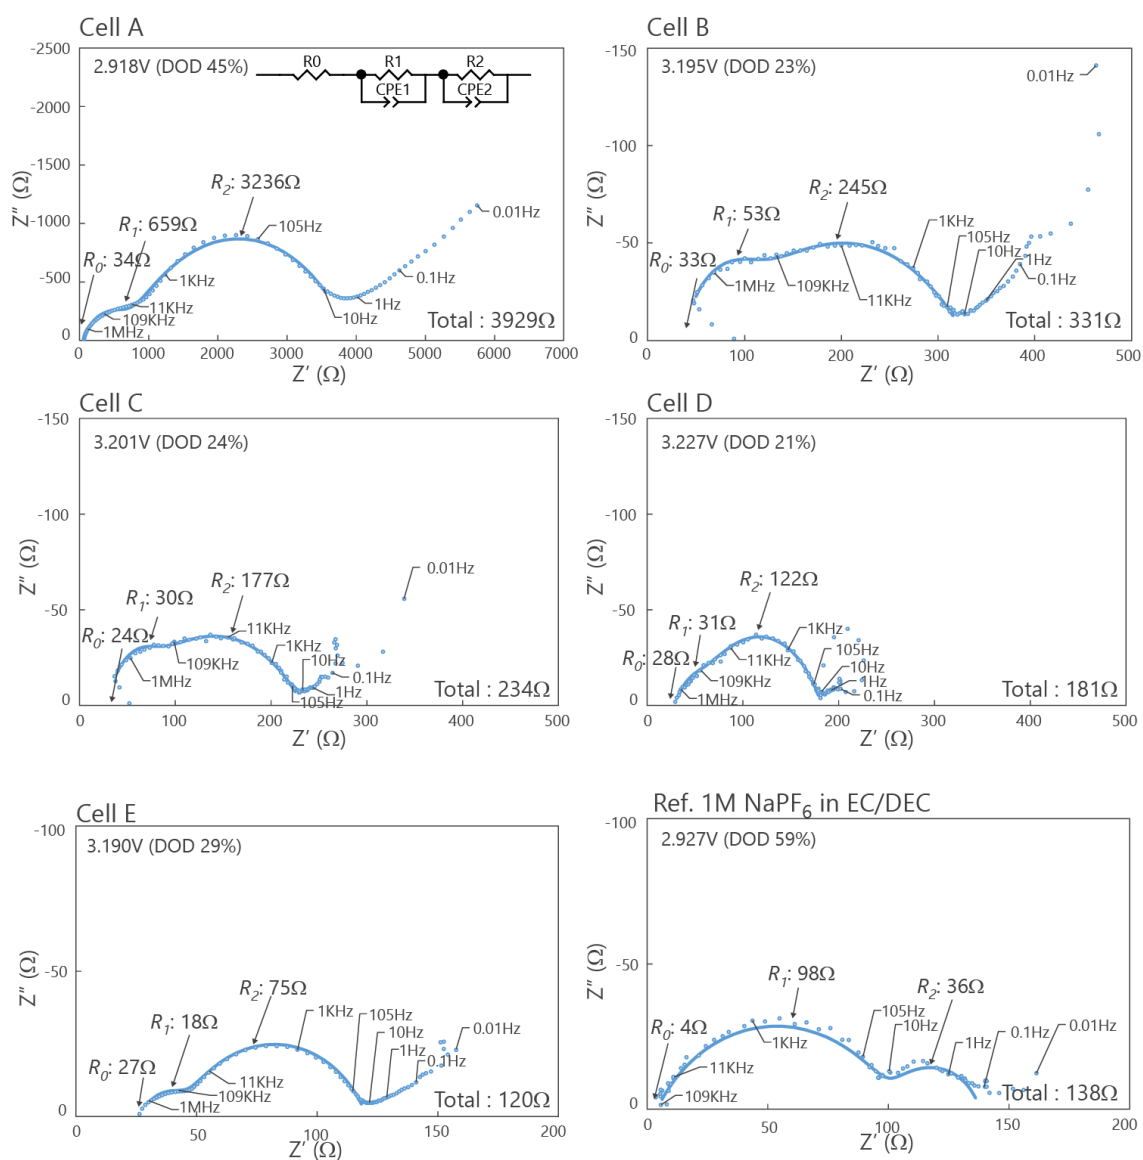

**Figure S2.** Nyquist plots of Cells A– E and 1 M NaPF<sub>6</sub> in EC/DEC obtained from 3D impedance spectra (Fig. S1).

NFP glass

10 m<sup>2</sup>g<sup>-1</sup> (D<sub>50</sub>:0.8 μm)

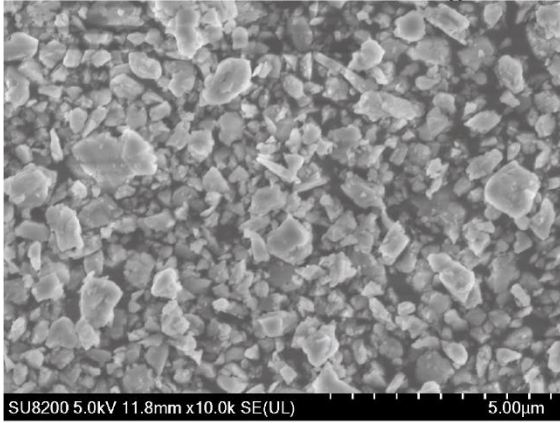

27 m<sup>2</sup>g<sup>-1</sup> (D<sub>50</sub>:0.2 μm)

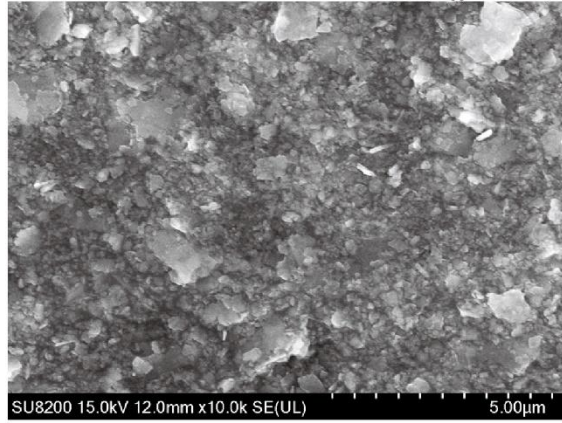

β"-alumina

5 m<sup>2</sup>g<sup>-1</sup> (D<sub>50</sub>:2 μm)

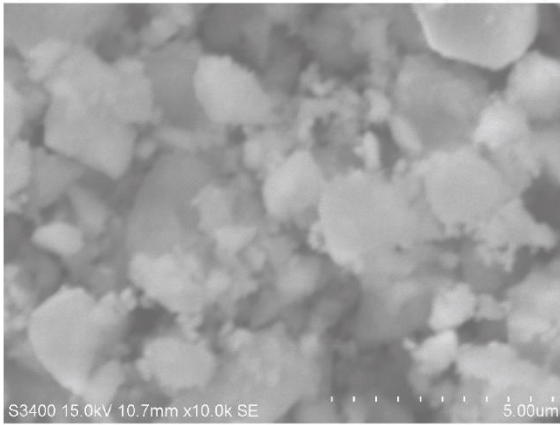

45 m<sup>2</sup>g<sup>-1</sup> (D<sub>50</sub>:0.1 μm)

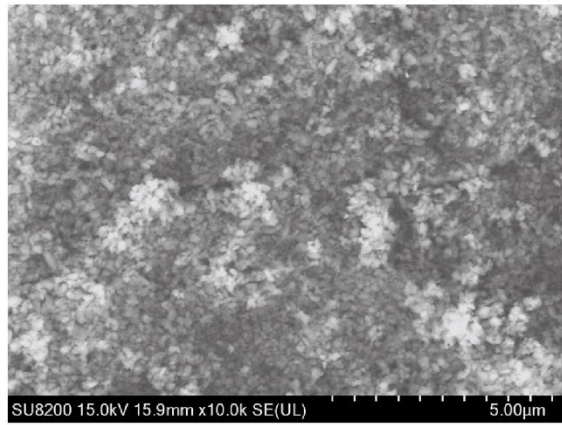

5 μm

**Figure S3.** SEM images of NFP glass powder and β"-alumina solid solution.

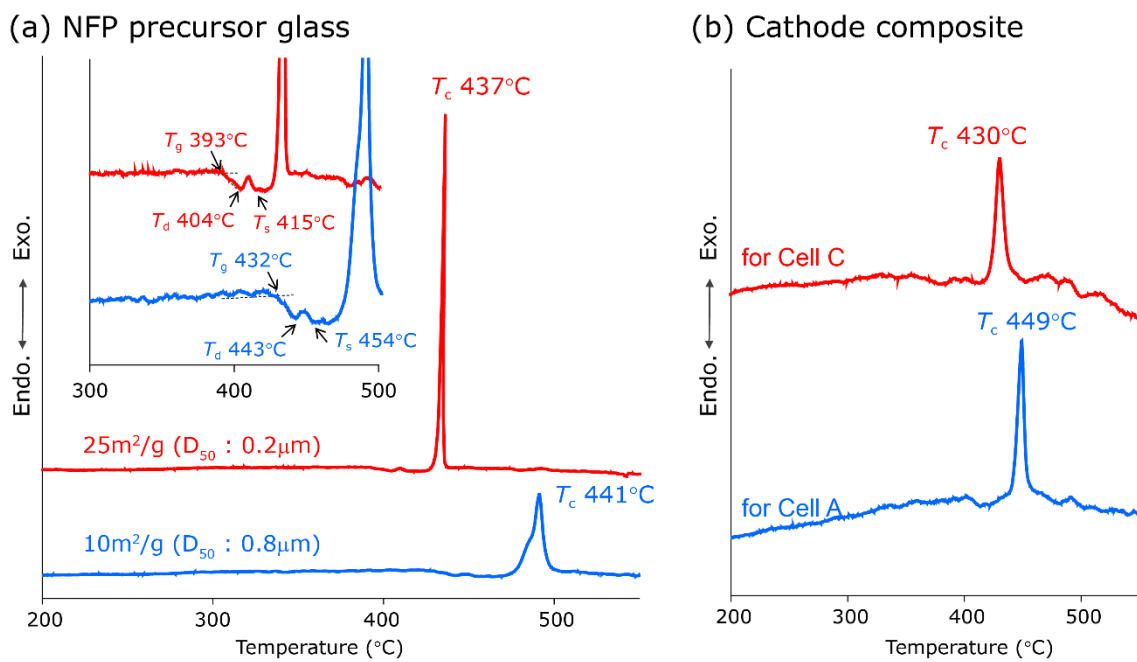

**Figure S4.** Differential thermal analysis curves of NFP glasses with different specific surface areas.  $T_d$  represents the yield point and  $T_s$  represents the softening point.

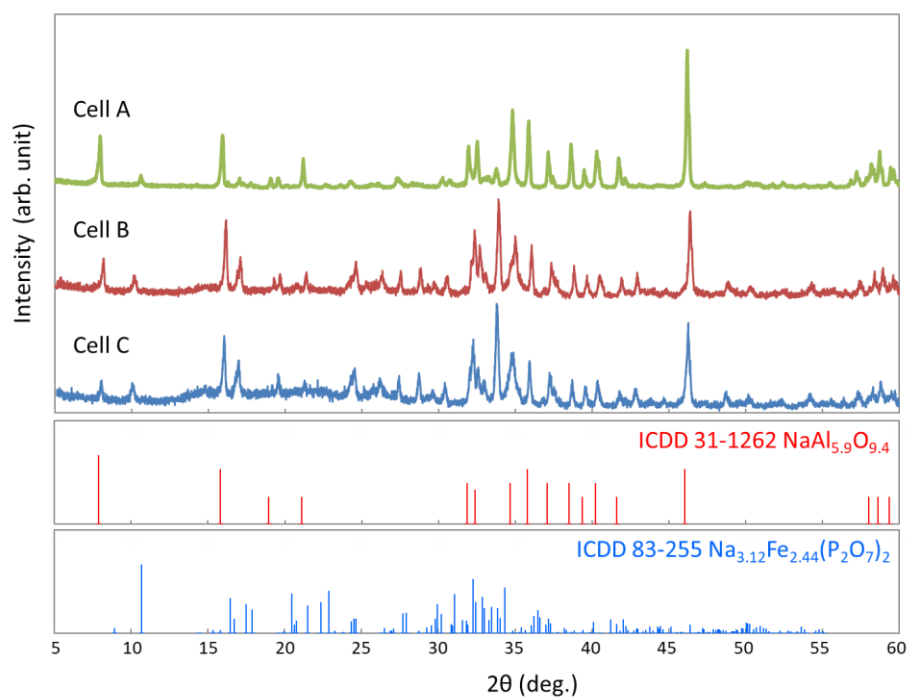

**Figure S5.** X-ray diffraction patterns of the NFP glass-ceramic cathode on  $\beta''$ -alumina solid electrolyte substrate calcined at 550 °C for 60 min (Cell A) and 525 °C for 30 min (Cells B and C) in  $\text{H}_2/\text{N}_2$  (4/96 v/v%). Cathode composition, NFP glass-ceramic :  $\beta''$ -alumina : AB = 72 : 25 : 3 wt% (Cell A), 83 : 13.5 : 3.5 wt% (Cell B), 83.4 : 12.4 : 4.2 wt% (Cell C).



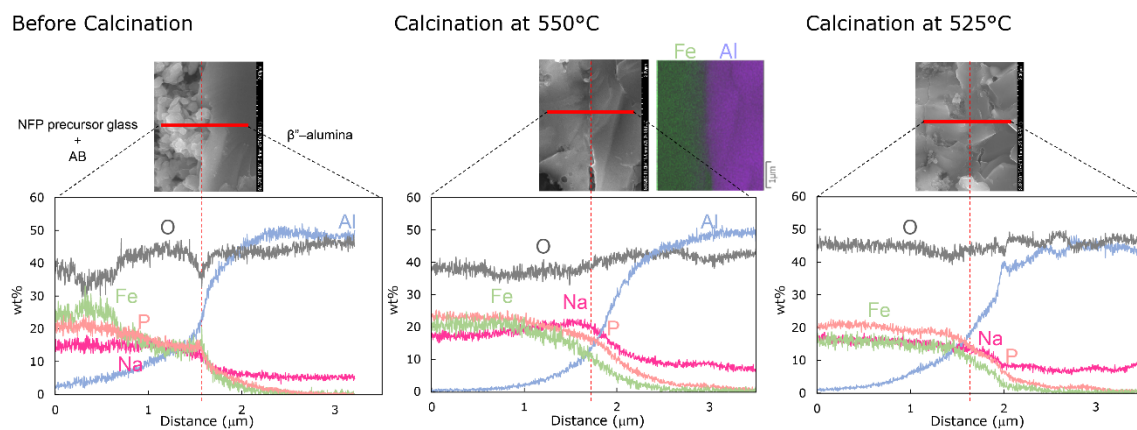

**Figure S6.** Scanning electron microscopy images of the NFP-β''-alumina interface and linear analysis profiles of components. The observations were made at an acceleration voltage of 15 kV and 25000× magnification.

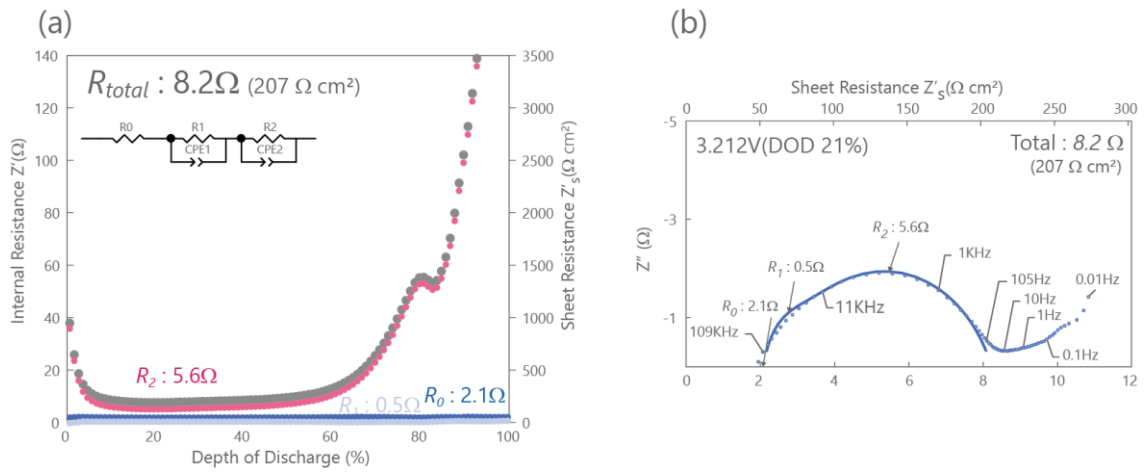

**Figure S7.** (a) Dependence of the internal resistance  $Z'$  ( $\Omega$ ) and sheet resistance  $Z_s'$  ( $\Omega \text{ cm}^2$ ) of the pouch cell based on Cell C on the depth of discharge, (b) Nyquist plot of the pouch cell obtained from 3D impedance spectra.

### **Supplementary video**

Electric fan powered by the  $\text{Na}_2\text{FeP}_2\text{O}_7$  glass ceramic cathode| $\beta$ "-alumina|Na pouch cell sandwiched between two ice blocks.
